# Supplementary material
Source: MDPI journal article supplement (https://www.mdpi.com/2038-9582/12/4/20)
Supplement: s1 [file s1]

Archive with 1 entries (1 files):
- std-2516624-supplementary.pdf
